# Supplementary material for: The Metalloproteinase ADAM28 Promotes Metabolic Dysfunction in Mice
Source: Int J Mol Sci. 2017 Apr 21;18(4):884. doi: 10.3390/ijms18040884 (PMC5412464; doi:10.3390/ijms18040884)
Supplement: Supplementary file 1 [file ijms-18-00884-s001.pdf]

**Supplementary Table S1.** Calculated T-values.

| <b>Figure Number</b> | <b>T-value must be<br/>greater than</b> | <b>Calculated T-value</b> | <b>Significance</b> |
|----------------------|-----------------------------------------|---------------------------|---------------------|
| 2                    | 2.064                                   | 2.238                     | Significant         |
| 8A                   | 2.776                                   | 4.422                     | Significant         |
| 8B                   | 2.776                                   | 3.304                     | Significant         |
| 10A                  | 2.447                                   | 2.4                       | Not significant     |
| 10E                  | 2.776                                   | 3.538                     | Significant         |
